# Supplementary material for: Imaging ultra-weak UV light below 100 pW cm−2 using a 4H–SiC photodetector with an Al2O3 interfacial layer
Source: Royal Society of Chemistry journal article supplement (doi:10.1039/d4cp01356e), 2024-01-01
Supplement: d4cp01356e1.pdf [file d4cp01356e1.pdf]

## Supplementary Information for:

# Imaging Ultra-weak UV Light Below 100 pW/cm<sup>2</sup> Using a 4H-SiC Photodetector with an Al<sub>2</sub>O<sub>3</sub> Interfacial Layer

Xinyang Pei<sup>1,#</sup>, Wenyan Wang<sup>1,#,\*</sup>, Kun Hu<sup>2</sup>, Yuying Xi<sup>2</sup>, Ting Ji<sup>1</sup>, Guohui Li<sup>2,\*</sup>, Yanxia Cui<sup>2,3</sup>

<sup>1</sup>College of Physics, Taiyuan University of Technology, Taiyuan 030024, China;

<sup>2</sup>College of Electronic Information and Optical Engineering, Taiyuan University of Technology,  
Taiyuan 030024, China;

<sup>3</sup>Shanxi-Zheda Institute of Advanced Materials and Chemical Engineering, Taiyuan 030032, China;

#The two authors contribute equally to this work

Corresponding authors: [wangwenyan@tyut.edu.cn](mailto:wangwenyan@tyut.edu.cn); [liguohui@tyut.edu.cn](mailto:liguohui@tyut.edu.cn)

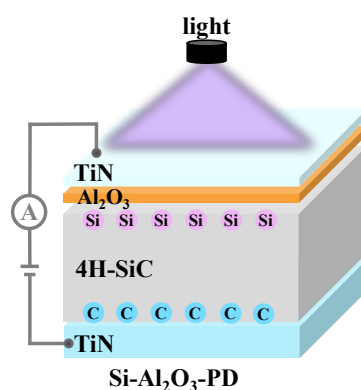

Fig. S1 Schematic diagram of the Si-Al<sub>2</sub>O<sub>3</sub>-PD reference device.

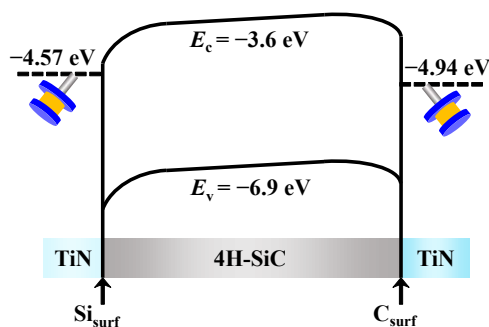

Fig. S2 Energy band diagram of the control 4H-SiC photodetector lacking Al<sub>2</sub>O<sub>3</sub>.

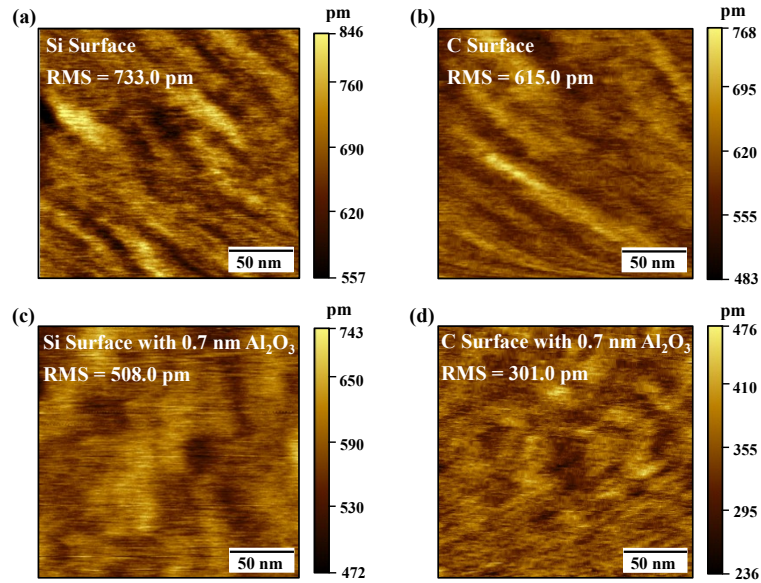

Fig. S3 (a-b) Surface morphology of Si surface and C surface of the 4H-SiC wafer, respectively. (c-d) Surface morphology of the 4H-SiC substrate with 0.7 nm  $\text{Al}_2\text{O}_3$  on Si surface and C surface, respectively. All images were characterized by the AFM technique.

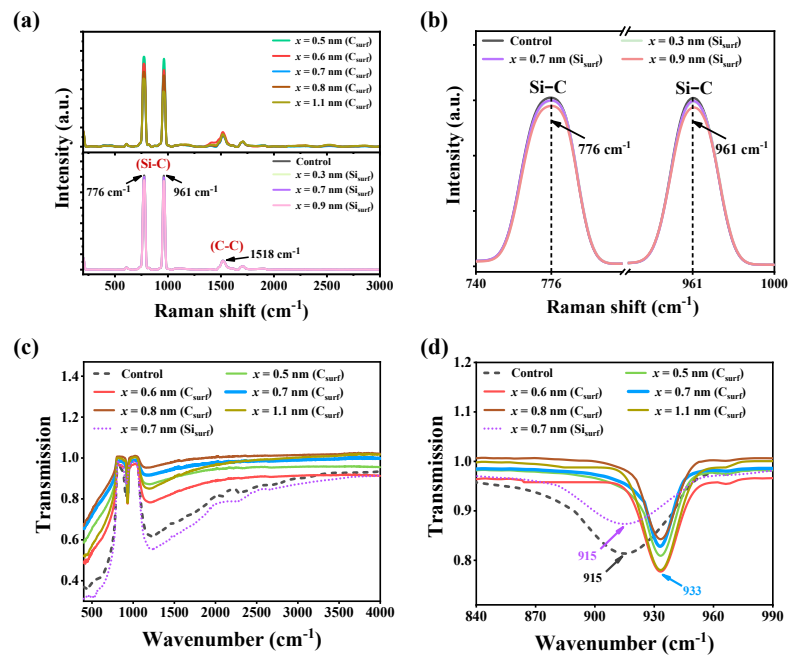

Fig. S4 (a) Raman spectra of 4H-SiC photodetectors with different thickness of ALD- $\text{Al}_2\text{O}_3$  on Si surface and C surface, respectively. (b) Expanded Raman spectra of 4H-SiC photodetectors with different thickness of ALD- $\text{Al}_2\text{O}_3$  on Si surface. (c) FT-IR spectra of pure 4H-SiC and the cases of C surfaces treated by different thickness of ALD- $\text{Al}_2\text{O}_3$ . (d) Expanded plots of FT-IR spectra shown in (c).

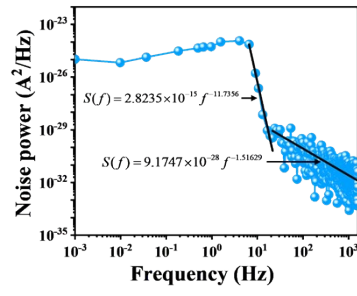

Fig. S5 Fitted noise current of the proposed C-Al<sub>2</sub>O<sub>3</sub>-PD at different frequencies.

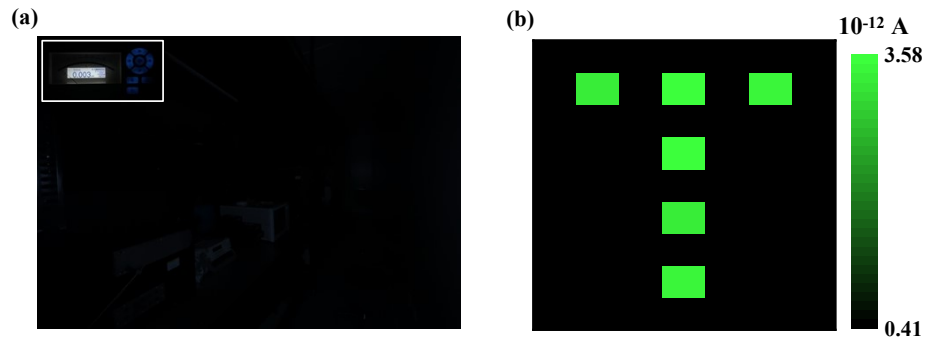

Fig. S6 (a) A real picture of the night vision environment with the light intensity of 3 nW. (b) Imaging result of the C-Al<sub>2</sub>O<sub>3</sub>-PD sensor in night vision environment.

Table S1. The photoelectric properties of typical SiC based photodetectors.

| Structure                                                                           | $I_{\text{dark}}$<br>(A)        | R<br>(mA W <sup>-1</sup> ) | D<br>(Jnoes)                         | WDL<br>(mW cm <sup>2</sup> )                | LDR<br>(dB) | Rise/fall<br>time<br>(ms)                       | Refere<br>nces |
|-------------------------------------------------------------------------------------|---------------------------------|----------------------------|--------------------------------------|---------------------------------------------|-------------|-------------------------------------------------|----------------|
| Cr/Cu/SiO <sub>2</sub> /graphene/4H-SiC/Cr/Cu                                       | 5.9×10 <sup>-10</sup><br>(0 V)  | 80<br>(285 nm)             | 2.9×10 <sup>12</sup><br>(Shot noise) | —                                           | —           | 4.5×10 <sup>-3</sup> /<br>3.210 <sup>-3</sup>   | 1              |
| Ag-4H-SiC nanohole-Ag                                                               | 1×10 <sup>-7</sup><br>(5 V)     | 824<br>(375 nm)            | 6×10 <sup>10</sup><br>(Shot noise)   | 0.25–32.6                                   | —           | 500/880                                         | 2              |
| TiN/4H-SiC/TiN                                                                      | 7×10 <sup>-14</sup><br>(20 V)   | 32.7<br>(360 nm)           | 1.3×10 <sup>13</sup><br>(1/f)        | 9.68×10 <sup>-8</sup><br>–15.7              | 164         | 0.52                                            | 3              |
| Cr/Au/SiO <sub>2</sub> /graphene/n <sup>-</sup> /n <sup>+</sup> 4H-SiC/ Cr/Au       | 5.8×10 <sup>-8</sup><br>(0 V)   | 0.75 V/W<br>(300 nm)       | 2.7×10 <sup>13</sup><br>(Shot noise) | 6×10 <sup>-6</sup><br>–1.2×10 <sup>-5</sup> | —           | 7.4×10 <sup>-5</sup> /<br>5.81×10 <sup>-4</sup> | 4              |
| Au NPs/Ti/Au/ n <sup>-</sup> /n <sup>+</sup> 4H-SiC                                 | 5×10 <sup>-15</sup><br>(5 V)    | 63<br>(270 nm)             | 4×10 <sup>13</sup><br>(Shot noise)   | —                                           | —           | 1.9×10 <sup>-</sup><br>6/2.2×10 <sup>-6</sup>   | 5              |
| Ni/Ti/Al/Au/SiO <sub>2</sub> / n-p-n 4H-SiC/ Ni/Ti/Al/Au                            | 1×10 <sup>-12</sup><br>(5 V)    | 130<br>(275 nm)            | 7.27×10 <sup>13</sup><br>(1/f)       | 1×10 <sup>-4</sup> –10                      | 44          | 1.179/0.668                                     | 6              |
| TiN/Au/PEDOT:PPS/SiC/In                                                             | 8.3×10 <sup>-6</sup><br>(1.1 V) | 2150<br>(254 nm)           | 1.9×10 <sup>13</sup><br>(Shot noise) | 5×10 <sup>-3</sup> –0.6                     | —           | 58.6/41.5                                       | 7              |
| Ti/Au/ZnGa <sub>2</sub> O <sub>3</sub> /4H-SiC/In                                   | ~10 <sup>-10</sup><br>(0 V)     | 115<br>(254 nm)            | —                                    | 0.04–1.64                                   | —           | 18.36/16.15                                     | 8              |
| Au/Au NPs/quasifreestanding graphene/Vicinal SiC                                    | —                               | 1.65<br>(365 nm)           | 2.82×10 <sup>8</sup><br>(Shot noise) | —                                           | —           | 3.5×10 <sup>3</sup> /<br>4.3×10 <sup>3</sup>    | 9              |
| Ni/Ti/Al/Au/SiO <sub>2</sub> /p <sup>-</sup> /p <sup>+</sup> /n <sup>+</sup> 4H-SiC | 6×10 <sup>-13</sup><br>(–10 V)  | 104<br>(13.5 nm)           | 3.4×10 <sup>12</sup><br>(1/f)        | —                                           | —           | —                                               | 10             |
| Ti/Au/graphene/4H-SiC                                                               | 5×10 <sup>-14</sup><br>(10 V)   | 134<br>(250 nm)            | 1.2×10 <sup>11</sup><br>(1/f)        | —                                           | —           | 0.01/0.033                                      | 11             |
| Ag/4H-SiC nanowire arrays/Ag                                                        | 9.1×10 <sup>-8</sup><br>(3 V)   | 220<br>(275 nm)            | 8.45×10 <sup>7</sup><br>(Shot noise) | 1.4–6.4                                     | —           | 47.3/49.3                                       | 12             |
| ITO/SiO <sub>2</sub> /p-i-n 4H-SiC nanocone/Ni                                      | 1×10 <sup>-12</sup><br>(–0.5 V) | 41.9<br>(360 nm)           | —                                    | 0.1–1×10 <sup>4</sup>                       | —           | 1.7/1.8                                         | 13             |

|                                                                               |                                                  |                                  |                                                                        |                                               |       |                                              |                  |
|-------------------------------------------------------------------------------|--------------------------------------------------|----------------------------------|------------------------------------------------------------------------|-----------------------------------------------|-------|----------------------------------------------|------------------|
| W/W <sub>x</sub> Si <sub>y</sub> O <sub>1-x-y</sub> /passivation layer/4H-SiC | 3×10 <sup>-13</sup><br>(-15 V)                   | 230<br>(275 nm)                  | —                                                                      | —                                             | —     | 7.6/4.7                                      | 14               |
| Pd/Au/epitaxial graphene/4H-SiC                                               | —                                                | 2457<br>(405 nm)                 | 1.72×10 <sup>7</sup><br>(Shot noise)                                   | 7.96–199                                      | —     | 1.7×10 <sup>4</sup> /<br>1.6×10 <sup>4</sup> | 15               |
| Ti/Au/SnS <sub>2</sub> /4H-SiC                                                | ~10 <sup>-10</sup><br>A/μm <sup>2</sup><br>(5 V) | 2.42×10 <sup>4</sup><br>(325 nm) | 7.3×10 <sup>13</sup><br>(Shot noise)                                   | 0.1–10                                        | —     | 17                                           | 16               |
| Ti/SiO <sub>2</sub> /graphene/4H-SiC/Ti                                       | <3×10 <sup>-3</sup><br>(3 V)                     | 254.1<br>(325 nm)                | 2.16×10 <sup>10</sup><br>(Shot noise)                                  | —                                             | —     | 2350/1110/<br>1500/22020                     | 17               |
| Ti/Ag/Si <sub>3</sub> N <sub>4</sub> /Pd/4H-SiC/Ti/Ag                         | 1×10 <sup>-12</sup><br>(-2 V)                    | 113<br>(248 nm)                  | —                                                                      | —                                             | —     | —                                            | 18               |
| NiAl/4H-SiC                                                                   | 6.2×10 <sup>-13</sup><br>(-0.5 V)                | 2.75×10 <sup>7</sup><br>(280 nm) | —                                                                      | —                                             | 147   | —                                            | 19               |
| β-Ga <sub>2</sub> O <sub>3</sub> /p-SiC/4H-SiC                                | 6.2×10 <sup>-12</sup><br>(0 V)                   | 10.35<br>(254 nm)                | 8.8×10 <sup>9</sup><br>(Shot noise)                                    | 7.9×10 <sup>-3</sup> –<br>91×10 <sup>-3</sup> | 64.38 | 11/19                                        | 20               |
| Ni/Ni <sub>2</sub> Si/n-4H-SiC/Ni                                             | 1.2×10 <sup>-10</sup><br>(15 V)                  | 120<br>(300 nm)                  | —                                                                      | —                                             | —     | 1.9×10 <sup>-4</sup>                         | 21               |
| p-type graphene/ZnS QDs/4H-SiC                                                | 1.7×10 <sup>-10</sup><br>(0 V)                   | 0.29<br>(250 nm)                 | 1.41×10 <sup>10</sup><br>(Shot noise)                                  | 0.155–<br>0.184                               | —     | 0.28/0.75                                    | 22               |
| n <sup>+</sup> -3C-SiC/SiO <sub>2</sub> /n-3C-SiC/p-Si/Al                     | 7.6×10 <sup>-6</sup><br>(2 V)                    | 3.2<br>(375 nm)                  | —                                                                      | 0.6–7.2                                       | —     | 320/360                                      | 23               |
| Graphene/β-Ga <sub>2</sub> O <sub>3</sub> /4H-SiC/Au                          | 5.1×10 <sup>-10</sup><br>(0V)                    | 180<br>(254 nm, -5<br>V)         | —                                                                      | 1×10 <sup>-2</sup> –<br>7×10 <sup>-2</sup>    | —     | 650/7800/1<br>73/15220                       | 24               |
| TiN/4H-SiC/Al <sub>2</sub> O <sub>3</sub> /TiN                                | 1.8×10 <sup>-14</sup><br>(20 V)                  | 4.89<br>(360 nm)                 | 1.3×10 <sup>13</sup><br>(Shot noise)<br>1.49×10 <sup>10</sup><br>(1/f) | 3.18×10 <sup>-8</sup><br>-10.2                | 172   | 0.3/0.29                                     | <b>This work</b> |

## References

- 1 A. K. Jehad, M. Fidan, Ö. Ünverdi and C. Çelebi, *Sensors Actuators A: Physical*, 2023, **355**, 114309.
- 2 K. Wang, H. Wang, C. Chen, W. Li, L. Wang, F. Hu, F. Gao, W. Yang, Z. Wang and S. Chen, *ACS Applied Materials & Interfaces*, 2023, **15**, 23457–23469.
- 3 M. Li, L. Geng, Y. Xi, K. Hu, L. Shi, W. Wang, Y. Tian, T. Ji, K. Mao and B. Xu, *Journal of Physics D: Applied Physics*, 2023, **56**, 375105.
- 4 A. K. Jehad, O. Ünverdi and C. Celebi, *Journal of Alloys and Compounds*, 2023, **969**, 172288.
- 5 M. Yuan, M. Zhang, Z. Fu, S. Han, Y. Zhang, S. Wu, R. Hong, X. Chen, J. Cai and D. Lin, *ACS Applied Nano Materials*, 2023, **6**, 9376-9384.
- 6 Y. Wang, W. Li, D. Zhou, W. Xu, F. Ren, D. Chen, R. Zhang, Y. Zheng and H. Lu, *IEEE Transactions on Electron Devices*, 2022, **70**, 159-166.
- 7 S. Li, L. Yang, Z. Liu, M. Zhang, Y. Guo and W. Tang, *Applied Physics Letters*, 2023, **122**.
- 8 D. Han, Y. Yang, L. Meng, S. Hu, K. Liu, H. Lin, N. Liu, W. Zhang and J. Ye, *Applied Physics Letters*, 2023, **123**.
- 9 I. Khadka, N. Alluri, M. Alsardia, N. J. Raj, A. Prasanna, B. U. Haq, S. Kim and S.-H. Kim, *Applied Surface Science*, 2023, **610**, 155275.
- 10 Z. Wang, D. Zhou, W. Xu, Y. Wang, F. Ren, D. Chen, R. Zhang, Y. Zheng and H. Lu, *IEEE Electron Device Letters*, 2022, **43**, 906-909.
- 11 H. He, N. Shetty, S. Kubatkin, P. Stadler, T. Löfwander, M. Fogelström, J. C. Miranda-Valenzuela, R. Yakimova, T. Bauch and S. Lara-Avila, *Applied Physics Letters*, 2022, **120**, 191101.
- 12 L. Li, S. Yuan, K. Amina, P. Zhai, Y. Su, R. Lou, X. Hao, H. Shan, T. Xue and H. Liu, *Sensors Actuators A: Physical*, 2022, **346**, 113878.
- 13 S. Guo, X. Zhao, Y. He, Y. Cai, M. Yang, X. Guo, X. Fu and L. Zhang, *IEEE Transactions on Electron Devices*, 2021, **68**, 6208-6215.
- 14 F. Du, Q. Song, X. Tang, Z. Zhang, H. Yuan, C. Han, C. Zhang, Y. Zhang and Y. Zhang, *IEEE Transactions on Electron Devices*, 2021, **68**, 5662-5665.
- 15 S. Rathore, D. K. Patel, M. K. Thakur, G. Haider, M. Kalbac, M. Kruskopf, C.-I. Liu, A. F. Rigosi, R. E. Elmquist and C.-T. Liang, *Carbon*, 2021, **184**, 72-81.
- 16 Q. Yue, W. Gao, P. Wen, Q. Chen, M. Yang, Z. Zheng, D. Luo, N. Huo, F. Zhang and J. Li, *Journal of Materials Chemistry C*, 2021, **9**, 15662-15670.
- 17 Y. Li, P. Chen, X. Chen, R. Xu, M. Liu, J. Zhou, C. Ge, H. Peng, X. Mao and J. Feng, *Advanced optical materials*, 2020, **8**, 2000559.
- 18 S. P. Karanth, M. A. Sumesh, V. Shobha, J. Sirisha, D. Yadav M, S. B. Vijay and K. V. Sriram, *IEEE Transactions on Electron Devices*, 2020, **67**, 3242-3249.
- 19 L. Di Benedetto, G. D. Licciardo, T. Erlbacher, A. J. Bauer and A. Rubino, *IEEE Transactions on Electron Devices*, 2019, **67**, 154-159.
- 20 J. Yu, L. Dong, B. Peng, L. Yuan, Y. Huang, L. Zhang, Y. Zhang and R. Jia, *Journal of Alloys and Compounds*, 2020, **821**, 153532.
- 21 A. Sciuto, A. Meli, L. Calcagno, S. Di Franco, M. Mazzillo, G. Franzo, S. Albergo, A. Tricomi, D. Longo and G. Giudice, *IEEE Sensors Journal*, 2019, **19**, 2931-2936.
- 22 H. Kan, W. Zheng, R. Lin, M. Li, C. Fu, H. Sun, M. Dong, C. Xu, J. Luo and Y. Fu, *ACS applied materials & interfaces*, 2019, **11**, 8412-8418.
- 23 A. R. M. Faisal, T. Dinh, P. Tanner, H.-P. Phan, T.-K. Nguyen, E. W. Streed and D. V. Dao, *IEEE Electron Device Letters*, 2018, **39**, 1219-1222.

- 24 Y. Qu, Z. Wu, M. Ai, D. Guo, Y. An, H. Yang, L. Li and W. Tang, *Journal of Alloys and Compounds*, 2016, **680**, 247-251.
